# Supplementary material for: Country compliance with WHO-recommended antenatal care guidelines: equity analysis of the 2015–2016 Demography and Health Survey in Myanmar
Source: PubMed Central journal article supplement — BMJ Glob Health. 2020 Dec 9;5(12):e002169. doi: 10.1136/bmjgh-2019-002169 (PMC7733101; doi:10.1136/bmjgh-2019-002169), 2020-12-09
Supplement: bmjgh-2019-002169supp001.pdf [file bmjgh-2019-002169supp001.pdf]

Supplementary 1. Predictive margins of the factors associated with adequacy of ANC component, Myanmar demographic and health survey, 2015-2016 (n = 2943)

| Study variables                             | Components of antenatal care |              |            |              |          |              |
|---------------------------------------------|------------------------------|--------------|------------|--------------|----------|--------------|
|                                             | Severely inadequate          |              | Inadequate |              | Adequate |              |
|                                             | Margin                       | 95% CI†      | Margin     | 95% CI†      | Margin   | 95% CI†      |
| <b><i>Location of household</i></b>         |                              |              |            |              |          |              |
| Rural                                       | 0.13                         | [0.12, 0.15] | 0.33       | [0.31, 0.35] | 0.53     | [0.51, 0.55] |
| Urban                                       | 0.05                         | [0.03, 0.07] | 0.25       | [0.22, 0.28] | 0.70     | [0.67, 0.74] |
| <b><i>Geographical zone</i></b>             |                              |              |            |              |          |              |
| Hilly zone                                  | 0.09                         | [0.07, 0.11] | 0.31       | [0.28, 0.34] | 0.60     | [0.57, 0.63] |
| Coastal zone                                | 0.15                         | [0.12, 0.18] | 0.34       | [0.30, 0.38] | 0.51     | [0.47, 0.55] |
| Delta zone                                  | 0.12                         | [0.09, 0.14] | 0.27       | [0.24, 0.31] | 0.61     | [0.57, 0.65] |
| Central plain zone                          | 0.14                         | [0.11, 0.16] | 0.31       | [0.28, 0.34] | 0.55     | [0.52, 0.59] |
| <b><i>Mother's working status</i></b>       |                              |              |            |              |          |              |
| Not working                                 | 0.09                         | [0.08, 0.11] | 0.29       | [0.26, 0.32] | 0.61     | [0.58, 0.64] |
| Agriculture related work                    | 0.14                         | [0.11, 0.17] | 0.37       | [0.32, 0.41] | 0.50     | [0.45, 0.54] |
| Non-Agriculture related work                | 0.13                         | [0.11, 0.14] | 0.30       | [0.28, 0.33] | 0.57     | [0.55, 0.59] |
| <b><i>Reading newspaper or magazine</i></b> |                              |              |            |              |          |              |
| No                                          | 0.14                         | [0.12, 0.15] | 0.31       | [0.29, 0.33] | 0.55     | [0.53, 0.57] |
| Yes                                         | 0.07                         | [0.06, 0.09] | 0.31       | [0.28, 0.33] | 0.62     | [0.59, 0.65] |
| <b><i>Place of antenatal care</i></b>       |                              |              |            |              |          |              |
| None/home/ other                            | 0.20                         | [0.17, 0.23] | 0.34       | [0.29, 0.38] | 0.46     | [0.42, 0.51] |
| Public health facility                      | 0.10                         | [0.09, 0.11] | 0.31       | [0.29, 0.33] | 0.59     | [0.57, 0.61] |
| Private health facility                     | 0.09                         | [0.05, 0.13] | 0.27       | [0.22, 0.32] | 0.63     | [0.58, 0.69] |
| <b><i>Birth assistant</i></b>               |                              |              |            |              |          |              |
| None/TBA/other untrained                    | 0.17                         | [0.14, 0.19] | 0.38       | [0.35, 0.41] | 0.45     | [0.41, 0.48] |
| Health professional                         | 0.09                         | [0.08, 0.11] | 0.29       | [0.27, 0.30] | 0.62     | [0.60, 0.64] |
| <b><i>Postnatal care</i></b>                |                              |              |            |              |          |              |
| No                                          | 0.15                         | [0.13, 0.16] | 0.34       | [0.31, 0.36] | 0.52     | [0.49, 0.54] |
| Yes                                         | 0.09                         | [0.08, 0.11] | 0.28       | [0.26, 0.30] | 0.63     | [0.60, 0.65] |

†Confidence interval (CI).
