# Supplementary material for: Country compliance with WHO-recommended antenatal care guidelines: equity analysis of the 2015–2016 Demography and Health Survey in Myanmar
Source: PubMed Central journal article supplement — BMJ Glob Health. 2020 Dec 9;5(12):e002169. doi: 10.1136/bmjgh-2019-002169 (PMC7733101; doi:10.1136/bmjgh-2019-002169), 2020-12-09
Supplement: bmjgh-2019-002169supp002.pdf [file bmjgh-2019-002169supp002.pdf]

Supplementary 2. Predictive margins of the factors associated with on time initiation of first ANC contacts, Myanmar demographic and health survey, 2015-2016 (n = 2943)

| Study variables                             | Initiation of first antenatal care contact               |              |                                                      |              |                                                        |              |
|---------------------------------------------|----------------------------------------------------------|--------------|------------------------------------------------------|--------------|--------------------------------------------------------|--------------|
|                                             | Very late initiation within third trimester (7-9 months) |              | Late initiation within second trimester (4-6 months) |              | On time initiation within first trimester (0-3 months) |              |
|                                             | Margin                                                   | 95% CI†      | Margin                                               | 95% CI†      | Margin                                                 | 95% CI†      |
| <b><i>Mother's current age (years)</i></b>  |                                                          |              |                                                      |              |                                                        |              |
| Under 20 years                              | 0.13                                                     | [0.05, 0.20] | 0.57                                                 | [0.46, 0.68] | 0.30                                                   | [0.20, 0.40] |
| 20-29 years                                 | 0.10                                                     | [0.08, 0.12] | 0.44                                                 | [0.41, 0.47] | 0.46                                                   | [0.43, 0.49] |
| 30-39 years                                 | 0.08                                                     | [0.06, 0.09] | 0.44                                                 | [0.42, 0.47] | 0.48                                                   | [0.45, 0.51] |
| 40 years and over                           | 0.09                                                     | [0.06, 0.11] | 0.40                                                 | [0.35, 0.45] | 0.52                                                   | [0.46, 0.57] |
| <b><i>Mother's education</i></b>            |                                                          |              |                                                      |              |                                                        |              |
| No education/ Primary                       | 0.11                                                     | [0.09, 0.12] | 0.43                                                 | [0.43, 0.48] | 0.46                                                   | [0.43, 0.48] |
| Secondary or higher                         | 0.06                                                     | [0.05, 0.08] | 0.45                                                 | [0.39, 0.44] | 0.49                                                   | [0.46, 0.52] |
| <b><i>Reading newspaper or magazine</i></b> |                                                          |              |                                                      |              |                                                        |              |
| No                                          | 0.10                                                     | [0.08, 0.11] | 0.45                                                 | [0.43, 0.47] | 0.45                                                   | [0.43, 0.47] |
| Yes                                         | 0.08                                                     | [0.06, 0.09] | 0.41                                                 | [0.39, 0.44] | 0.51                                                   | [0.48, 0.54] |
| <b><i>Watching television</i></b>           |                                                          |              |                                                      |              |                                                        |              |
| No                                          | 0.10                                                     | [0.08, 0.12] | 0.40                                                 | [0.36, 0.43] | 0.50                                                   | [0.47, 0.54] |
| Yes                                         | 0.09                                                     | [0.07, 0.11] | 0.45                                                 | [0.43, 0.47] | 0.46                                                   | [0.44, 0.48] |
| <b><i>Preceding birth interval</i></b>      |                                                          |              |                                                      |              |                                                        |              |
| Birth interval >3 years                     | 0.11                                                     | [0.08, 0.13] | 0.44                                                 | [0.39, 0.48] | 0.46                                                   | [0.41, 0.50] |
| Birth interval <3 years                     | 0.08                                                     | [0.06, 0.09] | 0.47                                                 | [0.45, 0.50] | 0.45                                                   | [0.42, 0.48] |
| 1st child                                   | 0.09                                                     | [0.07, 0.11] | 0.40                                                 | [0.36, 0.43] | 0.51                                                   | [0.48, 0.55] |
| <b><i>Birth assistant</i></b>               |                                                          |              |                                                      |              |                                                        |              |
| None/TBA/other untrained                    | 0.12                                                     | [0.09, 0.14] | 0.43                                                 | [0.39, 0.47] | 0.45                                                   | [0.41, 0.49] |
| Health professional                         | 0.08                                                     | [0.07, 0.09] | 0.44                                                 | [0.42, 0.46] | 0.48                                                   | [0.46, 0.50] |
| <b><i>Place of birth</i></b>                |                                                          |              |                                                      |              |                                                        |              |
| Non-health facility                         | 0.08                                                     | [0.07, 0.09] | 0.44                                                 | [0.42, 0.47] | 0.48                                                   | [0.45, 0.50] |
| Health facility                             | 0.11                                                     | [0.09, 0.13] | 0.43                                                 | [0.40, 0.46] | 0.46                                                   | [0.43, 0.49] |
| <b><i>Postnatal care</i></b>                |                                                          |              |                                                      |              |                                                        |              |
| No                                          | 0.11                                                     | [0.09, 0.12] | 0.46                                                 | [0.44, 0.49] | 0.43                                                   | [0.40, 0.45] |
| Yes                                         | 0.07                                                     | [0.06, 0.08] | 0.42                                                 | [0.39, 0.44] | 0.51                                                   | [0.49, 0.54] |

†Confidence interval (CI).
