# Supplementary material for: Country compliance with WHO-recommended antenatal care guidelines: equity analysis of the 2015–2016 Demography and Health Survey in Myanmar
Source: PubMed Central journal article supplement — BMJ Glob Health. 2020 Dec 9;5(12):e002169. doi: 10.1136/bmjgh-2019-002169 (PMC7733101; doi:10.1136/bmjgh-2019-002169), 2020-12-09
Supplement: bmjgh-2019-002169supp003.pdf [file bmjgh-2019-002169supp003.pdf]

Supplementary 3. Predictive margins of the factors associated with recommended number of antenatal care contacts, Myanmar demographic and health survey, 2015-2016 (n = 2943)

| Study variables                      | Number of Antenatal Care Contacts |              |                         |              |                               |              |
|--------------------------------------|-----------------------------------|--------------|-------------------------|--------------|-------------------------------|--------------|
|                                      | 1-3 ANC clinic contacts           |              | 4-7 ANC clinic contacts |              | 8 or more ANC clinic contacts |              |
|                                      | Margin                            | 95% CI†      | Margin                  | 95% CI†      | Margin                        | 95% CI†      |
| <b>Location of household</b>         |                                   |              |                         |              |                               |              |
| Rural                                | 0.34                              | [0.32, 0.36] | 0.48                    | [0.46, 0.50] | 0.18                          | [0.17, 0.20] |
| Urban                                | 0.25                              | [0.21, 0.29] | 0.53                    | [0.49, 0.57] | 0.22                          | [0.19, 0.25] |
| <b>Household wealth status</b>       |                                   |              |                         |              |                               |              |
| Lowest quintile                      | 0.38                              | [0.34, 0.41] | 0.48                    | [0.44, 0.52] | 0.14                          | [0.11, 0.18] |
| 2nd lowest quintile                  | 0.32                              | [0.29, 0.35] | 0.51                    | [0.47, 0.55] | 0.18                          | [0.14, 0.21] |
| Middle quintile                      | 0.31                              | [0.27, 0.34] | 0.50                    | [0.46, 0.54] | 0.19                          | [0.16, 0.22] |
| 4th quintile                         | 0.30                              | [0.26, 0.34] | 0.49                    | [0.45, 0.54] | 0.21                          | [0.18, 0.24] |
| Highest quintile                     | 0.25                              | [0.19, 0.30] | 0.51                    | [0.49, 0.56] | 0.25                          | [0.21, 0.28] |
| <b>Mother's education</b>            |                                   |              |                         |              |                               |              |
| No education/ primary                | 0.33                              | [0.31, 0.35] | 0.48                    | [0.45, 0.50] | 0.19                          | [0.17, 0.21] |
| Secondary or higher                  | 0.30                              | [0.28, 0.33] | 0.49                    | [0.47, 0.52] | 0.20                          | [0.18, 0.22] |
| <b>Husband's working status</b>      |                                   |              |                         |              |                               |              |
| Agriculture related work             | 0.33                              | [0.31, 0.35] | 0.51                    | [0.48, 0.53] | 0.16                          | [0.14, 0.18] |
| Non-Agriculture related work         | 0.31                              | [0.28, 0.34] | 0.46                    | [0.43, 0.49] | 0.23                          | [0.21, 0.25] |
| <b>Husband's education</b>           |                                   |              |                         |              |                               |              |
| No education/ primary                | 0.35                              | [0.33, 0.37] | 0.48                    | [0.46, 0.51] | 0.17                          | [0.15, 0.19] |
| Secondary or higher                  | 0.29                              | [0.26, 0.31] | 0.50                    | [0.47, 0.52] | 0.22                          | [0.20, 0.23] |
| <b>Reading newspaper or magazine</b> |                                   |              |                         |              |                               |              |
| No                                   | 0.34                              | [0.32, 0.36] | 0.46                    | [0.44, 0.48] | 0.20                          | [0.18, 0.21] |
| Yes                                  | 0.28                              | [0.25, 0.31] | 0.53                    | [0.50, 0.56] | 0.20                          | [0.18, 0.22] |
| <b>Place of antenatal care</b>       |                                   |              |                         |              |                               |              |
| Home/ other                          | 0.41                              | [0.37, 0.45] | 0.45                    | [0.40, 0.50] | 0.14                          | [0.10, 0.17] |
| Public health facility               | 0.31                              | [0.29, 0.33] | 0.50                    | [0.48, 0.52] | 0.19                          | [0.17, 0.20] |
| Private health facility              | 0.25                              | [0.10, 0.31] | 0.48                    | [0.42, 0.53] | 0.27                          | [0.23, 0.31] |
| <b>Birth assistant</b>               |                                   |              |                         |              |                               |              |
| None/TBA/other untrained             | 0.39                              | [0.36, 0.42] | 0.46                    | [0.42, 0.50] | 0.15                          | [0.11, 0.18] |
| Health professional                  | 0.29                              | [0.27, 0.31] | 0.50                    | [0.48, 0.52] | 0.21                          | [0.19, 0.22] |
| <b>Place of birth</b>                |                                   |              |                         |              |                               |              |
| Non-health facility                  | 0.36                              | [0.33, 0.38] | 0.50                    | [0.47, 0.53] | 0.14                          | [0.12, 0.16] |
| Health facility                      | 0.27                              | [0.24, 0.29] | 0.49                    | [0.46, 0.52] | 0.24                          | [0.22, 0.26] |
| <b>Postnatal care</b>                |                                   |              |                         |              |                               |              |
| No                                   | 0.37                              | [0.34, 0.38] | 0.47                    | [0.44, 0.49] | 0.17                          | [0.15, 0.18] |
| Yes                                  | 0.28                              | [0.26, 0.30] | 0.50                    | [0.47, 0.52] | 0.22                          | [0.21, 0.24] |

†Confidence interval (CI).
